# Supplementary material for: Composition-dependent photoluminescence in nanocrystalline La2Hf2−xZrxO7:Eu phosphor: role of chemical twin Zr/Hf environments around a luminescent center
Source: Royal Society of Chemistry journal article supplement (doi:10.1039/d3cp05454c), 2023-12-13
Supplement: d3cp05454c1.pdf [file d3cp05454c1.pdf]

### Supplementary Information

#### **Composition Dependent Photoluminescence in Nanocrystalline $\text{La}_2\text{Hf}_{2-x}\text{Zr}_x\text{O}_7\text{:Eu}$ Phosphor: Role of Chemical Twin Zr/Hf Environments Around Luminescent Center**

Santosh K. Gupta<sup>1,2\*</sup>, Sandeep Nigam,<sup>2,3</sup> and Yuanbing Mao<sup>4#</sup>

<sup>1</sup>Radiochemistry Division, Bhabha Atomic Research Centre, Mumbai-400085, India

<sup>2</sup>Homi Bhabha National Institute, Anushaktinagar, Mumbai – 400094, India

<sup>3</sup>Chemistry Division, Bhabha Atomic Research Centre, Mumbai-400085, India

<sup>4</sup>Department of Chemistry, Illinois Institute of Technology, 3101 South Dearborn Street, Chicago, IL 60616, USA

Corresponding authors: \*[santoshg@barc.gov.in](mailto:santoshg@barc.gov.in) and #[ymao17@iit.edu](mailto:ymao17@iit.edu)

#### **S1. CCT estimation:**

The correlated colour temperatures (CCT) of LHZOE are also calculated using McCamy and Kelly approximation using equation S1<sup>1,2</sup>:

$$CCT(x, y) = -449n^3 + 3525n^2 - 6823.3n + 5520.33 \quad (\text{S1})$$

where  $n = (x - x_e)/(y - y_e)$  is the inverse slope line,  $(x_e = 0.3320, y_e = 0.1858)$  is the “epicenter” which is close to the intersection point mentioned by Kelly.

#### **S2. PLQY estimation:**

The absolute value of the quantum yield (PLQY) is calculated by using an integrating sphere (Edinburgh, UK). For LHZO:Eu<sup>3+</sup> phosphor, the PLQY was determined using the equation S2 as shown below.<sup>3</sup>

$$QY = \frac{\text{number of photon emitted}}{\text{number of photon absorbed}} = \frac{\int L(Eu)}{\int E(\text{Reference}) - \int E(Eu)} \quad (\text{S2})$$

Where  $L(Eu)$  is the photoluminescence intensity of the phosphor (45 mg),  $E(\text{reference})$  and  $E(Eu)$  are the excitation light intensities of the reference and the phosphor samples, respectively.

$\int L$  (Eu) is the area under the curve of the photoluminescence spectrum of the phosphor sample and  $\int E$  (Reference) and  $\int E$  (Eu) are the areas under the excitation spectra of the reference and the phosphor sample.

### S3. Judd-Ofelt Calculations:

The chemical environment effect on the luminescent properties of  $\text{Eu}^{3+}$  ions can be better understood through Judd-Ofelt theory analysis of the transition intensity parameters of the LHZOE NPs.

The determination of  $\Omega_\lambda$  ( $\lambda = 2, 4$ , and  $6$ ) parameters from emission spectra are necessary, where the magnetic dipole transition  $^5\text{D}_0 \rightarrow ^7\text{F}_1$  can be noted as follow:

$$A_{md} = \frac{64\pi^4 k_{md}^3}{3h(2J+1)} n^3 S_{md} \quad (\text{S3})$$

Here,  $k_{md}$  represents the energy of the magnetic dipole in wavenumber and  $h$  is Planck's constant,  $6.626 \times 10^{-34} \text{J}\cdot\text{s}$ . In addition, the variable  $n$  depicts the refractive index of the host LHZO as 1.99 and  $2J' + 1$  is the degeneracy of the initial state (1 for  $^5\text{D}_0$ ). Furthermore,  $S_{md}$  is a constant independent of the host and is equal to  $9.6 \times 10^{-42}$ .<sup>4</sup> The electric dipole transitions can be denoted by  $^5\text{D}_0 \rightarrow ^7\text{F}_J$  ( $J = 2, 4$ , and  $6$ ) transitions where the radiation rate can be stated as follows<sup>5,6</sup>:

$$A_J = \frac{64\pi^4 e^2 k^3 n (n^2 + 2)^2}{3h(2J+1) 9} \sum_{\lambda=2,4,6} \Omega_\lambda \langle \Psi J || U^\lambda || \Psi' J' \rangle^2 \quad (\text{S4})$$

In this equation,  $e$  is the electric charge,  $k$  is the transition energy of electric dipole transitions in  $\text{cm}^{-1}$ ,  $\Omega_\lambda$  is the intensity parameter, and  $\langle \Psi J || U^\lambda || \Psi' J' \rangle^2$  values are the squared reduced matrix elements, whose values are 0.0032 and 0.0023 for  $J' = 2$  and  $4$ , respectively<sup>7</sup>. In all the parameters of the equations, Gaussian units are used for ease of calculating. Therefore, the transition intensity ratio between electronic dipole and magnetic dipole can be written as follow:

$$\frac{\int I_J(k)dk}{\int I_{md}(k)dk} = \frac{A_J}{A_{md}} = \frac{e^2 k_J^3 (n^2 + 2)^2}{k_{md}^3 9n^2} \Omega_\lambda \langle \Psi J \| U^\lambda \| \Psi' J' \rangle^2$$

(S5)

This can be easily simplified as follow:

$$A_J = \frac{64\pi^4 e^2 k^3 n (n^2 + 2)^2}{3h (2J + 1) 9} \Omega_\lambda \langle \Psi J \| U^\lambda \| \Psi' J' \rangle^2$$

(S6)

In equation 4, the value of  $\frac{\int I_J(k)dk}{\int I_{md}(k)dk}$  can be acquired from the integral area of the emission spectra. In addition,  $\Omega_\lambda$  can be determined from the calculated basis of the emission spectra. However, the  $\Omega_6$  intensity parameter is not included in this calculation due to the fact that  $^5D_0 \rightarrow ^7F_6$  transitions were not observed.

The internal quantum efficiency (IQE) of the  $^5D_0$  level of  $\text{Eu}^{3+}$  ions in the LHZOE NPs can be deduced using the emission spectra and lifetimes of the former electronic transition level. We can correlate the lifetime ( $\tau$ ), radiative ( $A_R$ ), and nonradiative ( $A_{NR}$ ) rates through the following equation:

$$\frac{1}{\tau} = A_R + A_{NR}$$

(S7)

Here the AR rate can be determined by adding over the radiative rates for each  $^5D_0 \rightarrow ^7F_J (J= 1-4)$ ,

$\sum_{J=1-4} A_J$ . Therefore, the IQE of the emitting  $^5D_0$  level is written as

$$IQE = \frac{A_R}{A_R + A_{NR}} = \tau \sum_{J=1-4} A_J$$

(S8)

In this case, the radiative contribution can be calculated from the relative intensities of the

$^5D_0 \rightarrow ^7F_J (J= 1-4)$  transitions. The  $^5D_0 \rightarrow ^7F_{5,6}$  branching ratios  $\left( \beta_J = \frac{A_J}{\sum A_J} \right)$  are neglected since both have poor relative intensity compare to the  $^5D_0 \rightarrow ^7F_{1-4}$  transitions.

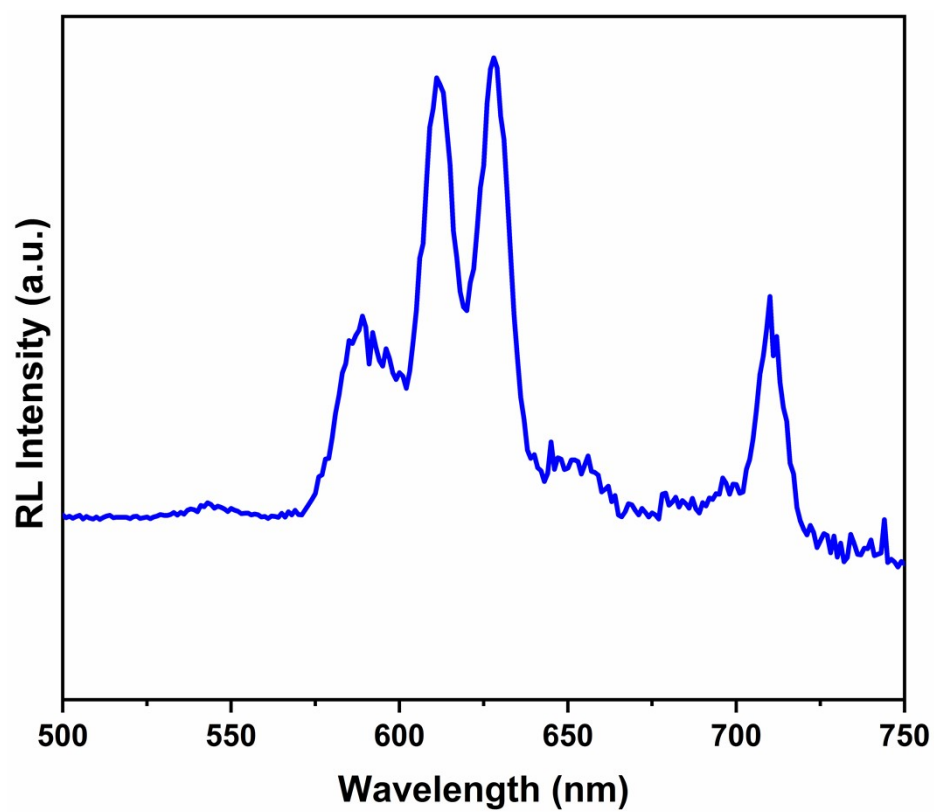

**Figure S1: RL spectrum of for the representative Hf<sub>0.7</sub>-Zr<sub>1.3</sub> LHZO NPs under X-ray excitation.**

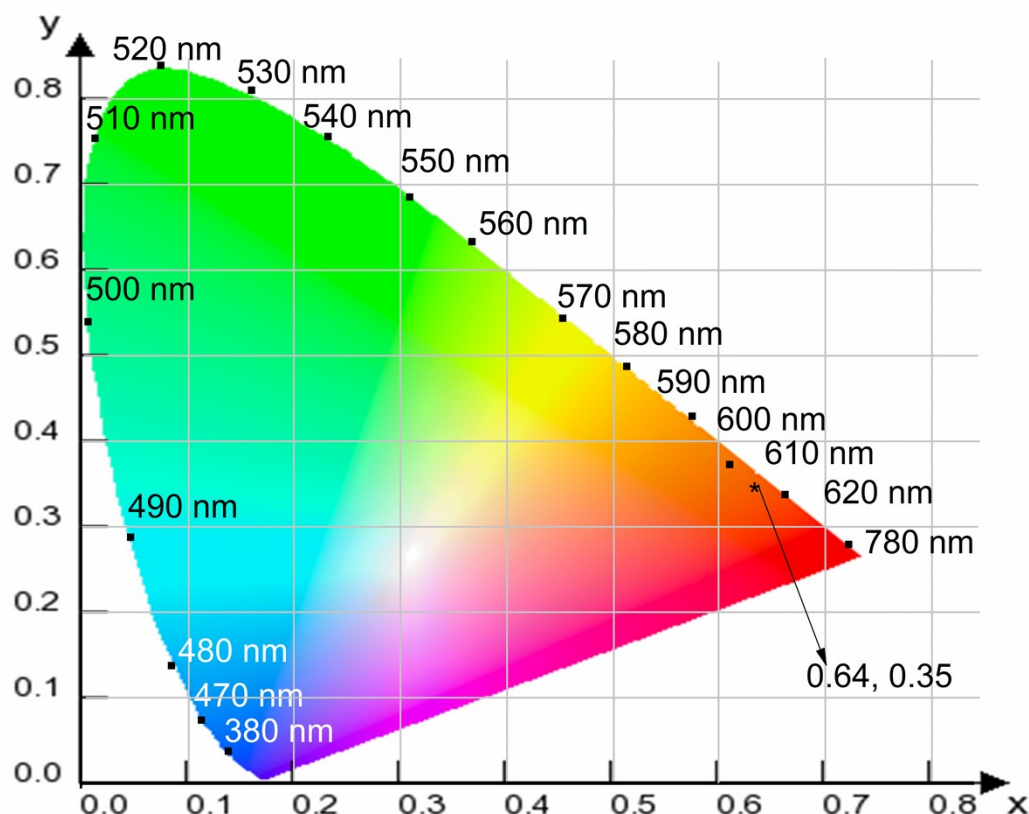

**Figure S2: CIE index diagram for the representative Hf0.7-Zr1.3 LHZO NPs**

1. Kelly, K. L., Lines of constant correlated color temperature based on MacAdam's (u, u) uniform chromaticity transformation of the CIE diagram. *JOSA* **1963**, 53, (8), 999-1002.
2. McCamy, C. S., Correlated color temperature as an explicit function of chromaticity coordinates. *Color Research & Application* **1992**, 17, (2), 142-144.
3. Liu, H.; Ren, F.; Zhang, H.; Han, Y.; Qin, H.; Zeng, J.; Wang, Y.; Sun, Q.; Li, Z.; Gao, M., Oral administration of highly bright Cr<sup>3+</sup> doped ZnGa<sub>2</sub>O<sub>4</sub> nanocrystals for in vivo targeted imaging of orthotopic breast cancer. *Journal of Materials Chemistry B* **2018**, 6, (10), 1508-1518.
4. Carnall, W.; Fields, P.; Rajnak, K., Spectral intensities of the trivalent lanthanides and actinides in solution. II. Pm<sup>3+</sup>, Sm<sup>3+</sup>, Eu<sup>3+</sup>, Gd<sup>3+</sup>, Tb<sup>3+</sup>, Dy<sup>3+</sup>, and Ho<sup>3+</sup>. *The Journal of Chemical Physics* **1968**, 49, 4412-4423.
5. Carnall, W.; Crosswhite, H.; Crosswhite, H. M. *Energy level structure and transition probabilities in the spectra of the trivalent lanthanides in LaF<sub>3</sub>*; Argonne National Lab.(ANL), Argonne, IL (United States): 1978.
6. Ribeiro, S. J.; Diniz, R.; Messaddeq, Y.; Nunes, L. A.; Aegerter, M. A., Eu<sup>3+</sup> and Gd<sup>3+</sup> spectroscopy in fluoroindate glasses. *Chemical Physics Letter* **1994**, 220, 214-218.
7. Werts, M. H.; Jukes, R. T.; Verhoeven, J. W., The emission spectrum and the radiative lifetime of Eu<sup>3+</sup> in luminescent lanthanide complexes. *Physical Chemistry Chemical Physics* **2002**, 4, 1542-1548.
